CORRECTION

# Correction: Fat body glycogen serves as a metabolic safeguard for the maintenance of sugar levels in *Drosophila* (doi:10.1242/dev.158865)

Takayuki Yamada, Okiko Habara, Hitomi Kubo and Takashi Nishimura

There was an error published in *Development* (2018) 145, dev158865 (doi:10.1242/dev.158865).

In Fig. 1A, the CNS control panel (top) incorrectly showed a duplicate of the GlyP-RNAi panel (bottom). The corrected Fig. 1 appears below.

This error does not affect the conclusions of the paper. The authors apologise to readers for this mistake.

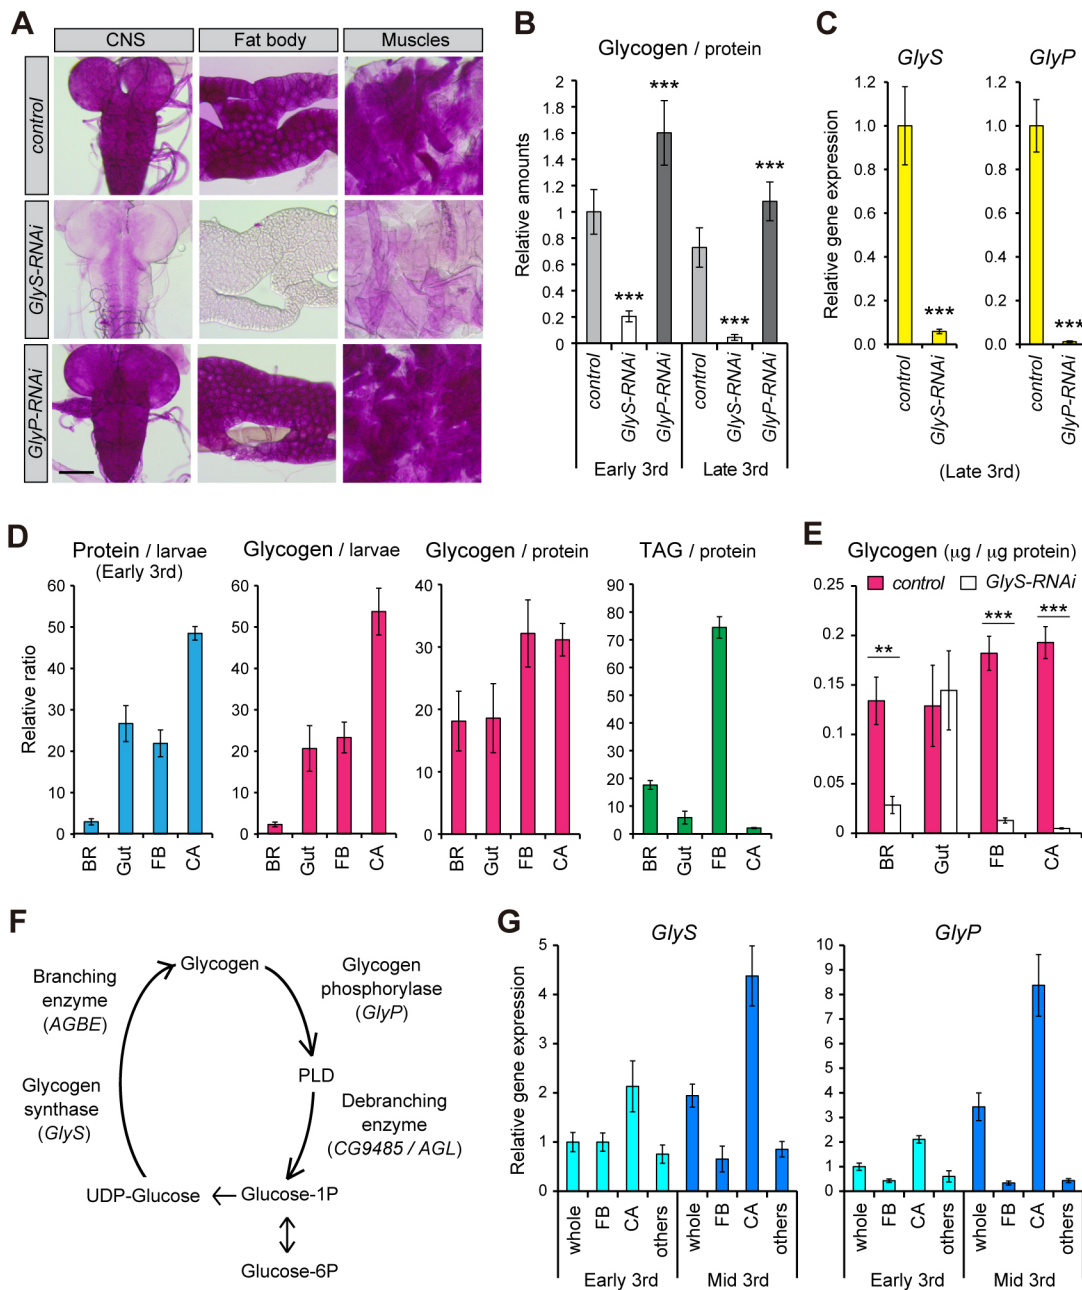

Source: https://cob.silverchair.com/dev/article-pdf/doi/10.1242/dev.165910/1857236/dev165910.pdf
